# Supplementary material for: Interpretable machine learning prediction of all-cause mortality
Source: PubMed Central journal article supplement (PMC9530124; doi:10.1038/s43856-022-00180-x), 2022-10-03
Supplement: 43856_2022_180_MOESM11_ESM.pdf [file 43856_2022_180_MOESM11_ESM.pdf]

## Description of Additional Supplementary Files

**File Name:** Supplementary Data 1

**Description:** The lists of the NHANES and UK Biobank features and the features used in all mortality risk scores and feature elimination experiments.

**File Name:** Supplementary Data 2

**Description:** The NHANES foreground samples when calculating the SHAP values for the 1-year mortality prediction model.

**File Name:** Supplementary Data 3

**Description:** The NHANES foreground samples when calculating the SHAP values for the 3-year mortality prediction model.

**File Name:** Supplementary Data 4

**Description:** The NHANES foreground samples when calculating the SHAP values for the 5-year mortality prediction model.

**File Name:** Supplementary Data 5

**Description:** The NHANES foreground samples when calculating the SHAP values for the 10-year mortality prediction model.

**File Name:** Supplementary Data 6

**Description:** The SHAP values for the NHANES 1-year mortality prediction model.

**File Name:** Supplementary Data 7

**Description:** The SHAP values for the NHANES 3-year mortality prediction model.

**File Name:** Supplementary Data 8

**Description:** The SHAP values for the NHANES 5-year mortality prediction model.

**File Name:** Supplementary Data 9

**Description:** The SHAP values for the NHANES 10-year mortality prediction model.
